# Supplementary material
Source: PubMed Central journal article supplement (PMC3570965)
Supplement: NIHMS434733-supplement-Figs_and_Tables.pdf [file NIHMS434733-supplement-Figs_and_Tables.pdf]

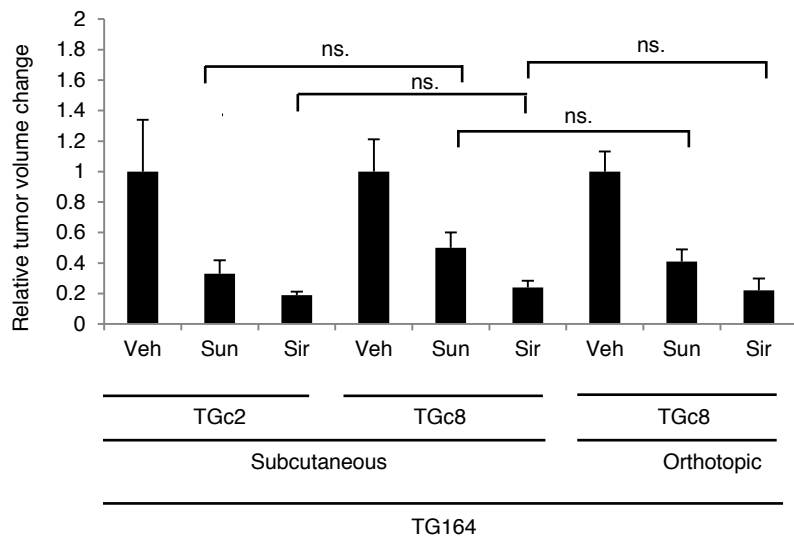

**Fig. S1.** Evaluation of the effects of implantation site (orthotopically vs subcutaneous) and passage on treatment for tumorgraft line TG164. Data are mean tumor volumes at the end of drug trial + SE ( $n=3$  per treatment arm). Veh, vehicle; Sun, sunitinib; Sir, sirolimus; ns., not significant.

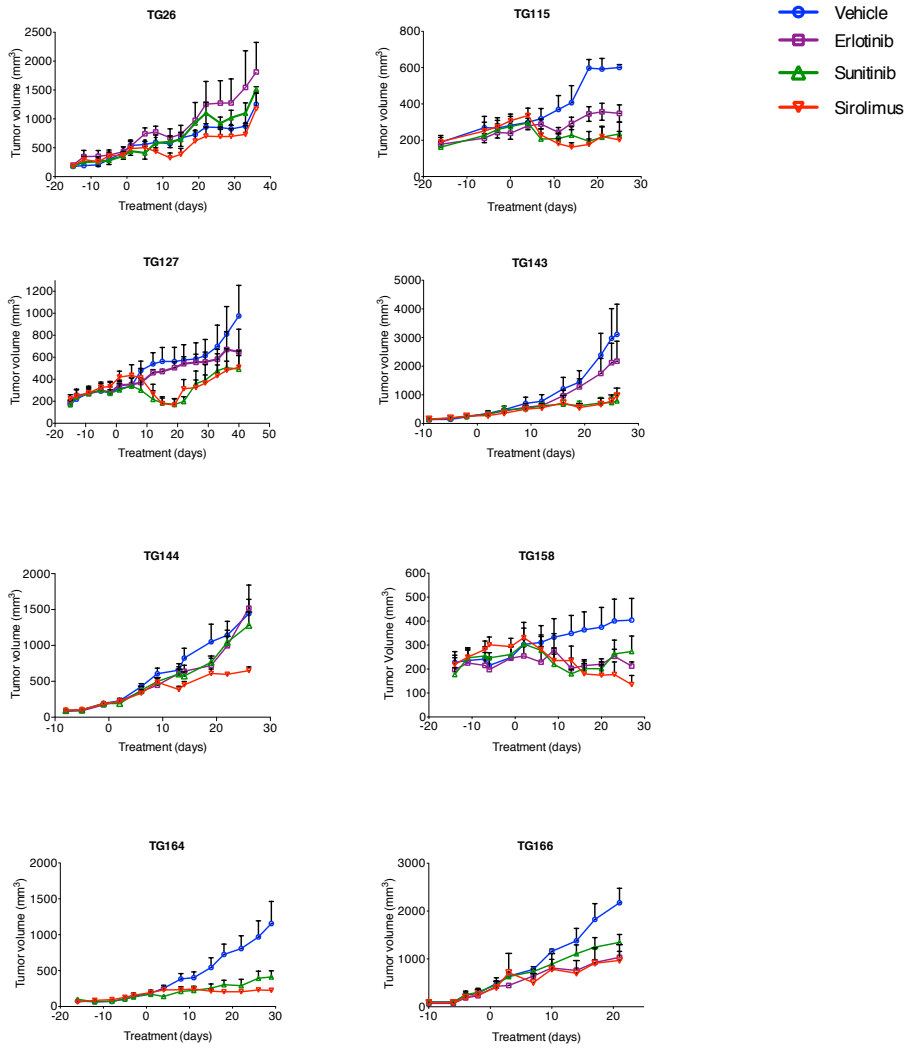

**Fig. S2.** Sunitinib, sirolimus, and erlotinib drug trials by individual tumorgraft line. Data are means + SE ( $n=3-5$  per treatment arm).

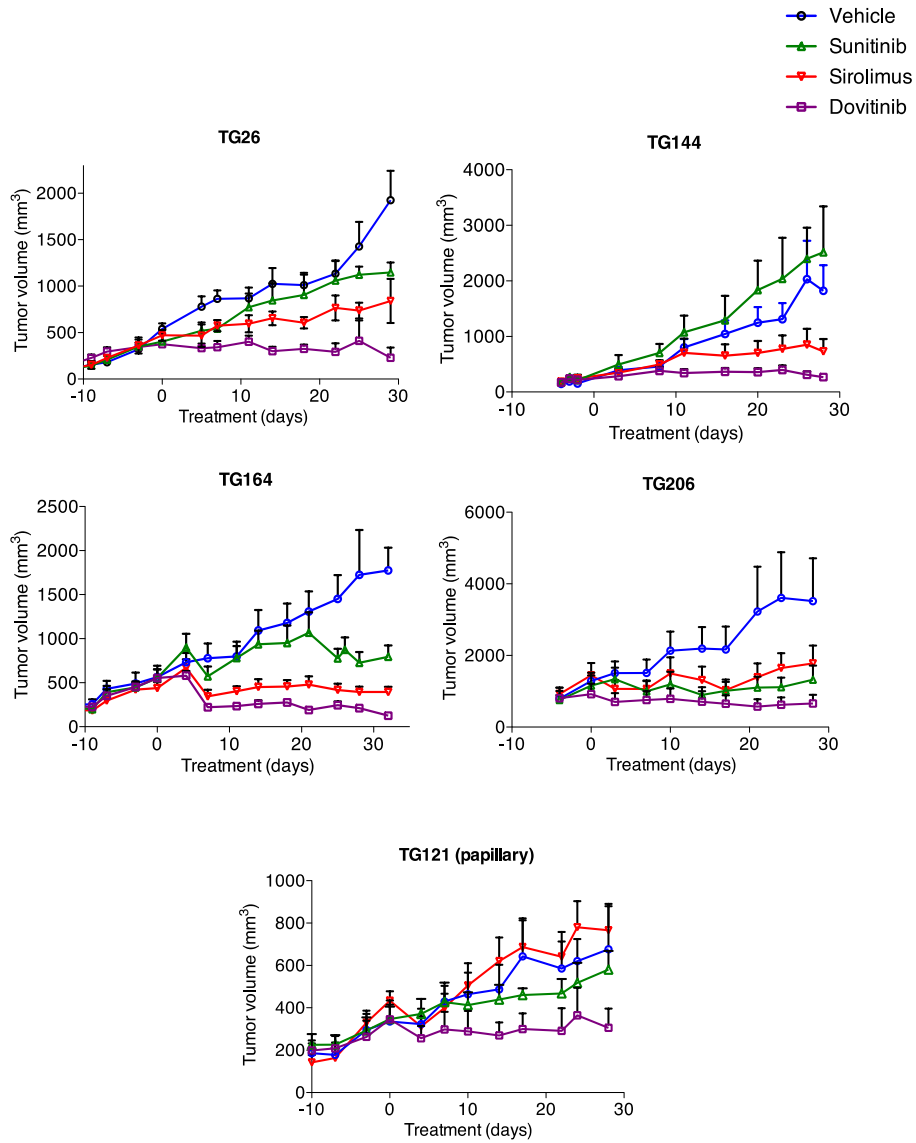

**Fig. S3.** Dovitinib drug trials by tumorgraft line including a papillary line (TG121). Data are means + SE ( $n=3-5$  per treatment arm).

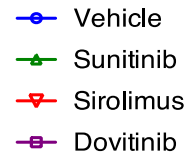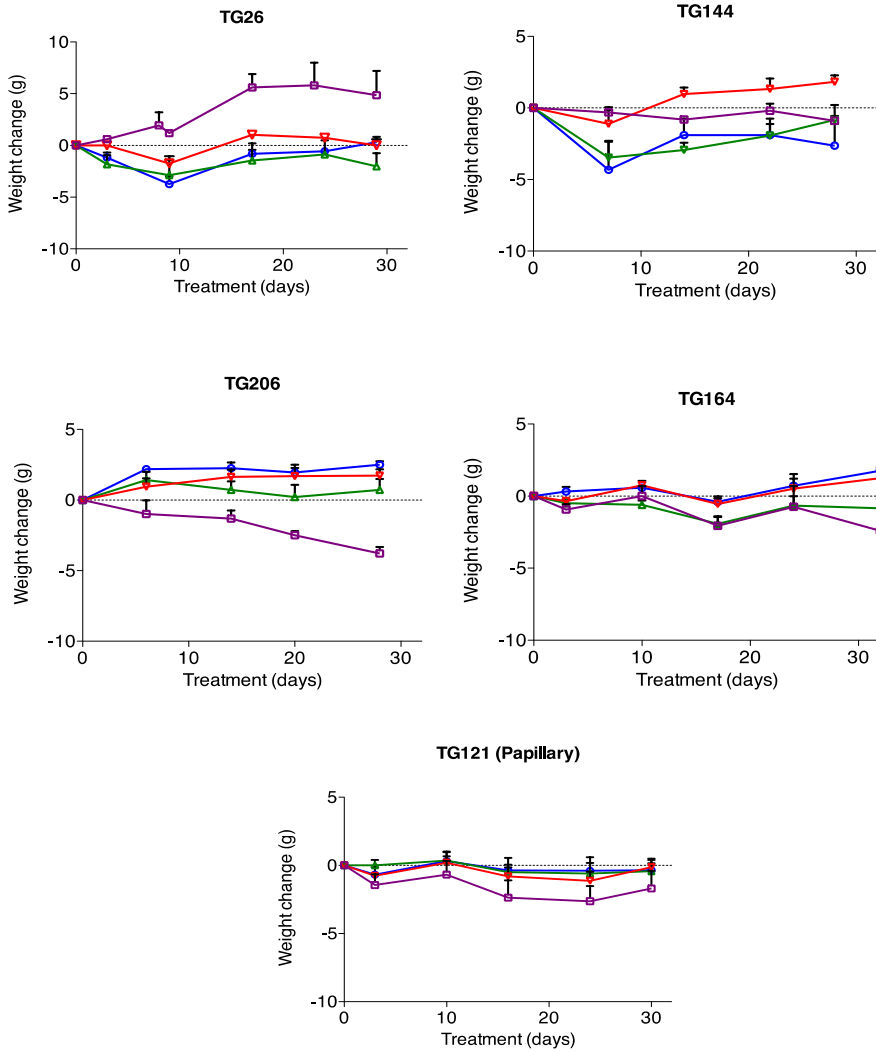

**Fig. S4.** Treatment effects on mouse weights. Data are means + SE ( $n=3-5$  per treatment arm).

**Table S1.** Histological evaluation of tumor and corresponding tumorgraft cohort

| ID    | Sample     | Histology                        | Grade                       | Architecture, morphology or nucleolar features                 | Cytoplasmic features                  | Inflammatory cells       |
|-------|------------|----------------------------------|-----------------------------|----------------------------------------------------------------|---------------------------------------|--------------------------|
| TG115 | T (diagn.) | clear-cell                       | 3                           | nested                                                         | clear; abundant                       | lymphocytes              |
|       | T (flank.) | clear-cell                       | 3                           | nested; mostly necrotic                                        | clear                                 | lymphocytes              |
|       | TGc1       | clear-cell                       | 3                           | nested; prominent nucleoli                                     | clear                                 |                          |
|       | TGc2       | clear-cell                       | 3                           | nested                                                         | clear; abundant                       |                          |
|       | TGc3       | clear-cell                       | 3                           | nested                                                         | clear; abundant                       |                          |
| TG121 | T (diagn.) | papillary                        | 3                           | solid; papillary                                               | eosinophilic                          |                          |
|       | T (flank.) | papillary                        | 3                           | solid; papillary                                               | eosinophilic                          |                          |
|       | TGc0       | papillary                        | 3                           | solid; papillary                                               | eosinophilic                          |                          |
|       | TGc2       | papillary                        | 3                           | solid; papillary                                               | eosinophilic                          |                          |
|       | TGc3       | papillary                        | 3                           | solid; papillary                                               | eosinophilic                          |                          |
|       | TGc5       | papillary                        | 3                           | solid; papillary                                               | eosinophilic                          |                          |
| TG127 | T (flank.) | clear-cell                       | 3                           | nested                                                         | clear                                 | lymphocytes              |
|       | TGc0       | clear-cell                       | 2                           | nested; oval nucleoli                                          | clear                                 | lymphocytes              |
|       | TGc1       | papillary with clear-cell        | 2                           | nested                                                         | clear                                 |                          |
|       | TGc3       | papillary with clear-cell        | 2                           | nested                                                         | clear                                 |                          |
|       | TGc4       | papillary with clear-cell        | 2                           | nested                                                         | clear                                 |                          |
| TG142 | T (diagn.) | clear-cell                       | 3                           | nested                                                         | clear                                 |                          |
|       | T (flank.) | clear-cell                       | 2                           | nested                                                         | clear                                 |                          |
|       | TGc1       | clear-cell                       | 2                           | nested                                                         | clear                                 |                          |
|       | TGc2       | clear-cell                       | 2                           | nested                                                         | clear                                 |                          |
| TG143 | T (diagn.) | clear-cell with 97% sarcomatoid  | 4                           | nested; spindle                                                | clear                                 |                          |
|       | T (flank.) | papillary with <1% sarcomatoid   | 4                           | spindle                                                        | eosinophilic                          |                          |
|       | TGc0       | sarcomatoid                      | 4                           | spindle                                                        | eosinophilic                          |                          |
|       | TGc4       | sarcomatoid                      | 4                           | spindle; epithelioid                                           | eosinophilic                          |                          |
|       | TGc7       | sarcomatoid                      | 4                           | spindle; epithelioid                                           | eosinophilic                          |                          |
|       | TGc14      | sarcomatoid                      | 4                           | spindle; epithelioid                                           | eosinophilic                          |                          |
| TG144 | T (diagn.) | clear-cell                       | 3                           | nested; necrotic                                               | clear                                 | lymphocytes; neutrophils |
|       | T (flank.) | clear-cell                       | 2                           | nested; necrotic                                               | clear                                 | lymphocytes; neutrophils |
|       | TGc0       | clear-cell                       | 3                           | nested; spindle                                                | clear                                 | neutrophils              |
|       | TGc2       | clear-cell                       | 3                           | nested; spindle                                                | clear                                 | neutrophils              |
|       | TGc5       | clear-cell                       | 3                           | nested; spindle                                                | clear                                 | neutrophils              |
|       | TGc6       | clear-cell                       | 3                           | nested; spindle                                                | clear                                 | neutrophils              |
|       | TGc11      | clear-cell                       | 3                           | nested; spindle                                                | clear                                 | neutrophils              |
|       |            |                                  |                             | spindle; epithelioid; prominent nucleoli; perinuclear clearing |                                       |                          |
| TG152 | T (diagn.) | poorly differentiated carcinoma  | 4                           | clearing                                                       | eosinophilic                          |                          |
|       | T (flank.) | <5% undifferentiated tumor cells | 4                           | spindle, prominent nucleoli                                    | eosinophilic                          |                          |
|       | TGc0       | poorly differentiated carcinoma  | 4                           | solid; prominent nucleoli                                      | eosinophilic                          |                          |
|       | TGc1       | poorly differentiated carcinoma  | 4                           | solid; perinuclear clearing                                    | eosinophilic                          |                          |
|       | TGc2       | poorly differentiated carcinoma  | 4                           | solid; perinuclear clearing                                    | eosinophilic                          |                          |
| TG156 | T (diagn.) | papillary                        | 3                           | papillary                                                      | eosinophilic                          |                          |
|       | T (flank.) | papillary                        | 3                           | papillary                                                      | eosinophilic                          |                          |
|       | TGc1       | papillary                        | 3                           | papillary                                                      | eosinophilic                          |                          |
|       | TGc2       | papillary                        | 3                           | papillary                                                      | eosinophilic                          |                          |
| TG158 | T (diagn.) | clear-cell with focal papillary  | 3                           | nested                                                         | clear                                 |                          |
|       | T (flank.) | clear-cell                       | 3                           | nested                                                         | clear                                 |                          |
|       | TGc0       | clear-cell                       | 3                           | nested                                                         | clear                                 |                          |
|       | TGc1       | clear-cell                       | 3                           | nested                                                         | clear                                 |                          |
|       | TGc2       | clear-cell                       | 3                           | nested                                                         | clear; eosinophilic                   |                          |
| TG164 | T (diagn.) | sarcomatoid with clear-cell      | 4                           | fascicular; spindle                                            | eosinophilic                          |                          |
|       | T (flank.) | sarcomatoid                      | 4                           | fascicular; spindle                                            | eosinophilic                          |                          |
|       | TGc0       | sarcomatoid                      | 4                           | fascicular; spindle                                            | eosinophilic                          |                          |
|       | TGc2       | sarcomatoid                      | 4                           | fascicular; spindle                                            | eosinophilic                          |                          |
|       | TGc5       | sarcomatoid                      | 4                           | fascicular; spindle                                            | eosinophilic                          |                          |
|       | TGc6       | sarcomatoid                      | 4                           | fascicular; spindle                                            | eosinophilic                          |                          |
|       | TGc11      | sarcomatoid                      | 4                           | fascicular; spindle                                            | eosinophilic                          |                          |
| TG165 | T (flank.) | clear-cell                       | 3                           | nested                                                         | clear; eosinophilic                   | lymphocytes              |
|       | TGc0       | clear-cell                       | 3                           | nested                                                         | clear                                 |                          |
|       | TGc1       | clear-cell                       | 3                           | nested                                                         | clear                                 |                          |
| TG166 | T (diagn.) | rhabdoid with sarcomatoid        | 4                           | solid                                                          | granular eosinophilic                 |                          |
|       | T (flank.) | rhabdoid                         | 4                           | solid; nested                                                  | granular eosinophilic; abundant       |                          |
|       | TGc0       | rhabdoid                         | 4                           | solid                                                          | granular eosinophilic                 |                          |
|       | TGc5       | rhabdoid with sarcomatoid        | 4                           | solid                                                          | granular eosinophilic                 |                          |
|       | TGc8       | rhabdoid with sarcomatoid        | 4                           | solid                                                          | granular eosinophilic                 |                          |
| TG168 | T (flank.) | unclassified                     | 3                           | solid; tubular; prominent nucleoli                             | granular eosinophilic; comedonecrosis |                          |
|       | TGc0       | unclassified                     | 3                           | solid; tubular; peritubular fibrosis; prominent nucleoli       | granular eosinophilic; comedonecrosis |                          |
|       | TGc1       | unclassified                     | 3                           | solid; tubular; peritubular fibrosis; prominent nucleoli       | granular eosinophilic; comedonecrosis |                          |
|       | TGc2       | unclassified                     | 3                           | solid; tubular; peritubular fibrosis; prominent nucleoli       | granular eosinophilic; comedonecrosis |                          |
|       | T (diagn.) | unclassified                     | 3                           | solid; tubular; papillary; predominantly necrotic              | granular eosinophilic                 |                          |
| TG169 | T (flank.) | unclassified                     | 3                           | solid; tubular; papillary; predominantly necrotic              | granular eosinophilic                 |                          |
|       | TGc0       | unclassified                     | 3                           | nested                                                         | granular eosinophilic                 |                          |
|       | TGc1       | unclassified                     | 3                           | solid; predominantly necrotic                                  | granular eosinophilic                 |                          |
|       | TGc2       | unclassified                     | 3                           | solid; tubular; papillary; predominantly necrotic              | granular eosinophilic                 |                          |
|       | TGc3       | unclassified                     | 3                           | solid; tubular; papillary; predominantly necrotic              | granular eosinophilic                 |                          |
|       | TG180      | T (flank.)                       | clear-cell                  | 2                                                              | nested                                | clear                    |
| TG206 | T (flank.) | clear-cell                       | 2                           | nested                                                         | clear                                 |                          |
|       | TGc1       | clear-cell                       | 2                           | nested                                                         | clear                                 |                          |
|       | TGc0       | clear-cell                       | 3                           | solid; nested                                                  | clear                                 |                          |
|       | TGc2       | clear-cell                       | 3                           | solid; nested                                                  | clear                                 |                          |
|       | TGc3       | clear-cell                       | 3                           | solid; nested                                                  | clear                                 |                          |
| TGc4  | clear-cell | 3                                | solid; nested; some spindle | clear                                                          |                                       |                          |

T (diagn.), surgical pathology tissue for diagnosis; T (flank.), flanking sections from samples used for tumorgraft generation; TGc#, tumorgraft cohort number

**Table S2.** Overrepresented Ingenuity Pathways corresponding to probesets upregulated in tumors over tumorgrafts (FDR  $q < 0.05$ , FC  $> 1.5$ ).

| Ingenuity Canonical Pathways                                                      | $p$          | Ratio |
|-----------------------------------------------------------------------------------|--------------|-------|
| 1 Role of NFAT in Regulation of the Immune Response                               | <b>6E-21</b> | 0.28  |
| 2 Systemic Lupus Erythematosus Signaling                                          | <b>6E-20</b> | 0.29  |
| 3 Antigen Presentation Pathway                                                    | <b>2E-17</b> | 0.56  |
| 4 Dendritic Cell Maturation                                                       | <b>1E-16</b> | 0.25  |
| 5 iCOS-iCOSL Signaling in T Helper Cells                                          | <b>3E-15</b> | 0.30  |
| 6 PKC $\theta$ Signaling in T Lymphocytes                                         | <b>5E-15</b> | 0.27  |
| 7 CTLA4 Signaling in Cytotoxic T Lymphocytes                                      | <b>8E-15</b> | 0.34  |
| 8 CD28 Signaling in T Helper Cells                                                | <b>1E-14</b> | 0.29  |
| 9 T Helper Cell Differentiation                                                   | <b>3E-14</b> | 0.39  |
| 10 Communication between Innate and Adaptive Immune Cells                         | <b>4E-14</b> | 0.29  |
| 11 Natural Killer Cell Signaling                                                  | <b>4E-14</b> | 0.32  |
| 12 Hepatic Fibrosis / Hepatic Stellate Cell Activation                            | <b>6E-14</b> | 0.27  |
| 13 Type I Diabetes Mellitus Signaling                                             | <b>8E-14</b> | 0.29  |
| 14 Crosstalk between Dendritic Cells and Natural Killer Cells                     | <b>3E-13</b> | 0.32  |
| 15 Graft-versus-Host Disease Signaling                                            | <b>4E-13</b> | 0.44  |
| 16 T Cell Receptor Signaling                                                      | <b>1E-12</b> | 0.29  |
| 17 Primary Immunodeficiency Signaling                                             | <b>8E-12</b> | 0.35  |
| 18 Cytotoxic T Lymphocyte-mediated Apoptosis of Target Cells                      | <b>2E-11</b> | 0.32  |
| 19 Leukocyte Extravasation Signaling                                              | <b>3E-11</b> | 0.22  |
| 20 Role of Pattern Recognition Receptors in Recognition of Bacteria and Viruses   | <b>4E-11</b> | 0.30  |
| 21 Altered T Cell and B Cell Signaling in Rheumatoid Arthritis                    | <b>8E-11</b> | 0.29  |
| 22 G-Protein Coupled Receptor Signaling                                           | <b>1E-10</b> | 0.16  |
| 23 OX40 Signaling Pathway                                                         | <b>1E-10</b> | 0.29  |
| 24 Autoimmune Thyroid Disease Signaling                                           | <b>1E-10</b> | 0.33  |
| 25 Allograft Rejection Signaling                                                  | <b>3E-10</b> | 0.28  |
| 26 IL-4 Signaling                                                                 | <b>7E-10</b> | 0.32  |
| 27 Calcium-induced T Lymphocyte Apoptosis                                         | <b>1E-09</b> | 0.31  |
| 28 Role of Macrophages, Fibroblasts and Endothelial Cells in Rheumatoid Arthritis | <b>1E-09</b> | 0.17  |
| 29 Growth Hormone Signaling                                                       | <b>1E-09</b> | 0.31  |
| 30 B Cell Development                                                             | <b>2E-09</b> | 0.43  |
| 31 NF- $\kappa$ B Signaling                                                       | <b>2E-09</b> | 0.21  |
| 32 Complement System                                                              | <b>6E-09</b> | 0.43  |
| 33 Pathogenesis of Multiple Sclerosis                                             | <b>8E-09</b> | 0.89  |
| 34 Role of JAK1 and JAK3 in $\gamma$ c Cytokine Signaling                         | <b>2E-08</b> | 0.29  |
| 35 Phospholipase C Signaling                                                      | <b>2E-08</b> | 0.17  |
| 36 Fc $\gamma$ Receptor-mediated Phagocytosis in Macrophages and Monocytes        | <b>4E-08</b> | 0.25  |
| 37 TREM1 Signaling                                                                | <b>5E-08</b> | 0.27  |
| 38 Nur77 Signaling in T Lymphocytes                                               | <b>7E-08</b> | 0.29  |
| 39 Atherosclerosis Signaling                                                      | <b>7E-08</b> | 0.22  |
| 40 Acute Phase Response Signaling                                                 | <b>1E-07</b> | 0.19  |
| 41 PTEN Signaling                                                                 | <b>1E-07</b> | 0.21  |
| 42 MSP-RON Signaling Pathway                                                      | <b>2E-07</b> | 0.31  |
| 43 B Cell Receptor Signaling                                                      | <b>2E-07</b> | 0.20  |
| 44 Glucocorticoid Receptor Signaling                                              | <b>3E-07</b> | 0.15  |
| 45 IL-9 Signaling                                                                 | <b>5E-07</b> | 0.33  |
| 46 GM-CSF Signaling                                                               | <b>5E-07</b> | 0.27  |
| 47 Prolactin Signaling                                                            | <b>5E-07</b> | 0.25  |
| 48 Colorectal Cancer Metastasis Signaling                                         | <b>8E-07</b> | 0.16  |
| 49 IL-8 Signaling                                                                 | <b>1E-06</b> | 0.17  |
| 50 Production of Nitric Oxide and Reactive Oxygen Species in Macrophages          | <b>1E-06</b> | 0.17  |
| 51 CCR5 Signaling in Macrophages                                                  | <b>2E-06</b> | 0.20  |
| 52 JAK/Stat Signaling                                                             | <b>2E-06</b> | 0.27  |
| 53 IL-2 Signaling                                                                 | <b>2E-06</b> | 0.28  |
| 54 Cdc42 Signaling                                                                | <b>2E-06</b> | 0.17  |
| 55 Fc $\gamma$ RIIB Signaling in B Lymphocytes                                    | <b>3E-06</b> | 0.24  |
| 56 IGF-1 Signaling                                                                | <b>5E-06</b> | 0.21  |
| 57 Fc Epsilon RI Signaling                                                        | <b>5E-06</b> | 0.21  |
| 58 IL-15 Signaling                                                                | <b>1E-05</b> | 0.24  |
| 59 PDGF Signaling                                                                 | <b>1E-05</b> | 0.23  |
| 60 Erythropoietin Signaling                                                       | <b>1E-05</b> | 0.22  |

Ratio, fraction of genes present in the signature list respect to all genes for each specific pathway.

**Table S4.** Overrepresented Ingenuity Canonical Pathways in RCC compared to normal renal cortices prior and after immune/stroma signature subtraction.

| Pathways prior to immune/stroma subtraction                               | p            | Ratio | #  | Pathways after immune/stroma subtraction                        | p            | Ratio | #   |
|---------------------------------------------------------------------------|--------------|-------|----|-----------------------------------------------------------------|--------------|-------|-----|
| 1 ATM Signaling                                                           | <b>4E-14</b> | 0.56  | 1  | 1 ATM Signaling                                                 | <b>1E-16</b> | 0.56  | 1   |
| 2 Role of BRCA1 in DNA Damage Response                                    | <b>3E-11</b> | 0.46  | 2  | 2 Role of BRCA1 in DNA Damage Response                          | <b>2E-13</b> | 0.46  | 2   |
| <b>3 Role of Pattern Recognition Receptors in Recognition of Bacteria</b> | <b>8E-10</b> | 0.37  |    | 3 Role of CHK Proteins in Cell Cycle Checkpoint Control         | <b>5E-11</b> | 0.54  | 4   |
| 4 Role of CHK Proteins in Cell Cycle Checkpoint Control                   | <b>2E-9</b>  | 0.54  | 3  | 4 Hereditary Breast Cancer Signaling                            | <b>8E-10</b> | 0.29  | 5   |
| 5 Hereditary Breast Cancer Signaling                                      | <b>7E-9</b>  | 0.31  | 4  | 5 Cell Cycle Control of Chromosomal Replication                 | <b>1E-9</b>  | 0.52  | 7   |
| <b>6 Antigen Presentation Pathway</b>                                     | <b>2E-8</b>  | 0.47  |    | 6 DNA Double-Strand Break Repair by Homologous Recombination    | <b>5E-9</b>  | 0.65  | 9   |
| 7 Cell Cycle Control of Chromosomal Replication                           | <b>2E-8</b>  | 0.52  | 5  | 7 Cell Cycle: G2/M DNA Damage Checkpoint Regulation             | <b>3E-8</b>  | 0.39  | 18  |
| 8 p53 Signaling                                                           | <b>3E-8</b>  | 0.34  | 9  | 8 Aryl Hydrocarbon Receptor Signaling                           | <b>5E-8</b>  | 0.24  | 23  |
| 9 DNA Double-Strand Break Repair by Homologous Recombination              | <b>5E-8</b>  | 0.65  | 6  | 9 p53 Signaling                                                 | <b>5E-8</b>  | 0.30  | 8   |
| 10 Type I Diabetes Mellitus Signaling                                     | <b>9E-8</b>  | 0.30  | 68 | 10 Mitotic Roles of Polo-Like Kinase                            | <b>8E-7</b>  | 0.32  | 27  |
| 11 Molecular Mechanisms of Cancer                                         | <b>1E-7</b>  | 0.21  | 11 | 11 Molecular Mechanisms of Cancer                               | <b>2E-6</b>  | 0.17  | 11  |
| <b>12 Dendritic Cell Maturation</b>                                       | <b>1E-7</b>  | 0.25  |    | 12 Cyclins and Cell Cycle Regulation                            | <b>2E-5</b>  | 0.25  | 35  |
| <b>13 Crosstalk between Dendritic Cells and Natural Killer Cells</b>      | <b>2E-7</b>  | 0.32  |    | 13 Pyrimidine Metabolism                                        | <b>2E-5</b>  | 0.18  | 61  |
| 14 Hepatic Fibrosis / Hepatic Stellate Cell Activation                    | <b>4E-7</b>  | 0.28  | 26 | 14 Death Receptor Signaling                                     | <b>2E-5</b>  | 0.28  | 22  |
| 15 Pancreatic Adenocarcinoma Signaling                                    | <b>5E-7</b>  | 0.29  | 17 | 15 Mismatch Repair in Eukaryotes                                | <b>3E-5</b>  | 0.38  | 39  |
| <b>16 Role of NFAT in Regulation of the Immune Response</b>               | <b>7E-7</b>  | 0.24  |    | 16 Cell Cycle: G1/S Checkpoint Regulation                       | <b>4E-5</b>  | 0.28  | 40  |
| <b>17 Natural Killer Cell Signaling</b>                                   | <b>7E-7</b>  | 0.31  |    | 17 Pancreatic Adenocarcinoma Signaling                          | <b>5E-5</b>  | 0.22  | 15  |
| 18 Cell Cycle: G2/M DNA Damage Checkpoint Regulation                      | <b>9E-7</b>  | 0.39  | 7  | 18 DNA Double-Strand Break Repair by Non-Homologous End Joining | <b>3E-4</b>  | 0.37  | 60  |
| <b>19 iCOS-iCOSL Signaling in T Helper Cells</b>                          | <b>3E-6</b>  | 0.27  |    | 19 Ephrin Receptor Signaling                                    | <b>4E-4</b>  | 0.17  | 46  |
| <b>20 T Helper Cell Differentiation</b>                                   | <b>5E-6</b>  | 0.33  |    | 20 Hypoxia Signaling in the Cardiovascular System               | <b>5E-4</b>  | 0.25  | 73  |
| 21 IL-8 Signaling                                                         | <b>7E-6</b>  | 0.23  | 49 | 21 ILK Signaling                                                | <b>6E-4</b>  | 0.18  | 36  |
| 22 Death Receptor Signaling                                               | <b>1E-5</b>  | 0.32  | 14 | 22 Ovarian Cancer Signaling                                     | <b>8E-4</b>  | 0.19  | 33  |
| 23 Aryl Hydrocarbon Receptor Signaling                                    | <b>1E-5</b>  | 0.24  | 8  | 23 Prostate Cancer Signaling                                    | <b>1E-3</b>  | 0.20  | 53  |
| <b>24 TREM1 Signaling</b>                                                 | <b>1E-5</b>  | 0.30  |    | 24 Small Cell Lung Cancer Signaling                             | <b>2E-3</b>  | 0.19  | 50  |
| <b>25 Systemic Lupus Erythematosus Signaling</b>                          | <b>2E-5</b>  | 0.22  |    | 25 Endoplasmic Reticulum Stress Pathway                         | <b>2E-3</b>  | 0.39  | 98  |
| <b>26 Production of Nitric Oxide and Reactive Oxygen Species in Macro</b> | <b>2E-5</b>  | 0.22  |    | 26 Hepatic Fibrosis / Hepatic Stellate Cell Activation          | <b>3E-3</b>  | 0.18  | 14  |
| 27 Mitotic Roles of Polo-Like Kinase                                      | <b>2E-5</b>  | 0.32  | 10 | 27 Induction of Apoptosis by HIV1                               | <b>3E-3</b>  | 0.21  | 86  |
| 28 Colorectal Cancer Metastasis Signaling                                 | <b>3E-5</b>  | 0.21  | 50 | 28 TNFR1 Signaling                                              | <b>4E-3</b>  | 0.23  | 79  |
| <b>29 PKCθ Signaling in T Lymphocytes</b>                                 | <b>4E-5</b>  | 0.23  |    | 29 Breast Cancer Regulation by Stathmin1                        | <b>4E-3</b>  | 0.16  | 75  |
| 30 Reelin Signaling in Neurons                                            | <b>5E-5</b>  | 0.29  | 63 | 30 Wnt/β-catenin Signaling                                      | <b>4E-3</b>  | 0.17  | 92  |
| <b>31 IL-4 Signaling</b>                                                  | <b>5E-5</b>  | 0.30  |    | 31 Antiproliferative Role of TOB in T Cell Signaling            | <b>4E-3</b>  | 0.31  | 90  |
| <b>32 Acute Myeloid Leukemia Signaling</b>                                | <b>9E-5</b>  | 0.28  |    | 32 Granzyme B Signaling                                         | <b>4E-3</b>  | 0.38  | 77  |
| 33 Ovarian Cancer Signaling                                               | <b>9E-5</b>  | 0.24  | 22 | 33 Bladder Cancer Signaling                                     | <b>5E-3</b>  | 0.20  | 124 |
| <b>34 Fcy Receptor-mediated Phagocytosis in Macrophages and Monoc</b>     | <b>1E-4</b>  | 0.27  |    | 34 Melanoma Signaling                                           | <b>5E-3</b>  | 0.24  | 62  |
| 35 Cyclins and Cell Cycle Regulation                                      | <b>1E-4</b>  | 0.26  | 12 | 35 Germ Cell-Sertoli Cell Junction Signaling                    | <b>6E-3</b>  | 0.17  | 57  |
| 36 ILK Signaling                                                          | <b>1E-4</b>  | 0.22  | 21 | 36 CD27 Signaling in Lymphocytes                                | <b>6E-3</b>  | 0.21  | 94  |
| <b>37 CD28 Signaling in T Helper Cells</b>                                | <b>2E-4</b>  | 0.24  |    | 37 HIF1α Signaling                                              | <b>7E-3</b>  | 0.19  | 88  |
| <b>38 Phospholipase C Signaling</b>                                       | <b>2E-4</b>  | 0.20  |    | 38 Semaphorin Signaling in Neurons                              | <b>7E-3</b>  | 0.23  | 100 |
| 39 Mismatch Repair in Eukaryotes                                          | <b>2E-4</b>  | 0.38  | 15 | <b>39 Estrogen Receptor Signaling</b>                           | <b>7E-3</b>  | 0.17  |     |
| 40 Cell Cycle: G1/S Checkpoint Regulation                                 | <b>2E-4</b>  | 0.30  | 16 | 40 Role of PKR in Interferon Induction and Antiviral Response   | <b>8E-3</b>  | 0.22  | 65  |
| <b>41 Graft-versus-Host Disease Signaling</b>                             | <b>2E-4</b>  | 0.32  |    | 41 Renal Cell Carcinoma Signaling                               | <b>8E-3</b>  | 0.20  | 72  |
| <b>42 OX40 Signaling Pathway</b>                                          | <b>2E-4</b>  | 0.25  |    | 42 Myc Mediated Apoptosis Signaling                             | <b>8E-3</b>  | 0.21  | 63  |
| <b>43 Cytotoxic T Lymphocyte-mediated Apoptosis of Target Cells</b>       | <b>2E-4</b>  | 0.27  |    | 43 Glioma Signaling                                             | <b>8E-3</b>  | 0.17  | 51  |
| <b>44 Leukocyte Extravasation Signaling</b>                               | <b>2E-4</b>  | 0.22  |    | 44 Tumoricidal Function of Hepatic Natural Killer Cells         | <b>0.010</b> | 0.29  | 54  |
| <b>45 CTLA4 Signaling in Cytotoxic T Lymphocytes</b>                      | <b>2E-4</b>  | 0.26  |    | 45 HGF Signaling                                                | <b>0.010</b> | 0.18  | 56  |
| 46 Ephrin Receptor Signaling                                              | <b>3E-4</b>  | 0.20  | 19 | 46 SAPK/JNK Signaling                                           | <b>0.010</b> | 0.18  | 52  |
| <b>47 Autoimmune Thyroid Disease Signaling</b>                            | <b>3E-4</b>  | 0.26  |    | 47 PI3K/AKT Signaling                                           | <b>0.011</b> | 0.16  | 76  |
| <b>48 B Cell Receptor Signaling</b>                                       | <b>4E-4</b>  | 0.22  |    | 48 Apoptosis Signaling                                          | <b>0.011</b> | 0.18  | 125 |
| <b>49 CCR5 Signaling in Macrophages</b>                                   | <b>4E-4</b>  | 0.22  |    | 49 IL-8 Signaling                                               | <b>0.011</b> | 0.15  | 21  |
| 50 Small Cell Lung Cancer Signaling                                       | <b>4E-4</b>  | 0.24  | 24 | 50 Colorectal Cancer Metastasis Signaling                       | <b>0.016</b> | 0.14  | 28  |
| 51 Glioma Signaling                                                       | <b>4E-4</b>  | 0.23  | 43 | 51 Role of Oct4 in Mammalian Embryonic Stem Cell Pluripotency   | <b>0.017</b> | 0.22  | 131 |
| 52 SAPK/JNK Signaling                                                     | <b>4E-4</b>  | 0.25  | 46 | 52 Huntington's Disease Signaling                               | <b>0.020</b> | 0.14  | 119 |
| 53 Prostate Cancer Signaling                                              | <b>4E-4</b>  | 0.24  | 23 | 53 PTEN Signaling                                               | <b>0.022</b> | 0.15  | 70  |
| 54 Tumoricidal Function of Hepatic Natural Killer Cells                   | <b>5E-4</b>  | 0.42  | 44 | 54 TWEAK Signaling                                              | <b>0.023</b> | 0.21  | 109 |
| <b>55 Altered T Cell and B Cell Signaling in Rheumatoid Arthritis</b>     | <b>5E-4</b>  | 0.25  |    | 55 Agrin Interactions at Neuromuscular Junction                 | <b>0.028</b> | 0.19  | 105 |
| 56 HGF Signaling                                                          | <b>5E-4</b>  | 0.25  | 45 | 56 Glioblastoma Multiforme Signaling                            | <b>0.028</b> | 0.15  | 115 |
| 57 Germ Cell-Sertoli Cell Junction Signaling                              | <b>8E-4</b>  | 0.22  | 35 | <b>57 4-1BB Signaling in T Lymphocytes</b>                      | <b>0.029</b> | 0.21  |     |
| <b>58 GM-CSF Signaling</b>                                                | <b>9E-4</b>  | 0.27  |    | 58 ERK5 Signaling                                               | <b>0.031</b> | 0.19  | 137 |
| 59 Glioma Invasiveness Signaling                                          | <b>9E-4</b>  | 0.28  | 66 | 59 TR/RXR Activation                                            | <b>0.032</b> | 0.17  | 132 |
| 60 DNA Double-Strand Break Repair by Non-Homologous End Joining           | <b>1E-3</b>  | 0.37  | 18 | 60 Rac Signaling                                                | <b>0.032</b> | 0.15  | 96  |
| 61 Pyrimidine Metabolism                                                  | <b>1E-3</b>  | 0.19  | 13 | 61 Non-Small Cell Lung Cancer Signaling                         | <b>0.034</b> | 0.17  | 87  |
| 62 Melanoma Signaling                                                     | <b>1E-3</b>  | 0.30  | 34 | <b>62 RAN Signaling</b>                                         | <b>0.035</b> | 0.22  |     |
| 63 Myc Mediated Apoptosis Signaling                                       | <b>1E-3</b>  | 0.28  | 42 | 63 Reelin Signaling in Neurons                                  | <b>0.037</b> | 0.17  | 30  |
| <b>64 Communication between Innate and Adaptive Immune Cells</b>          | <b>1E-3</b>  | 0.21  |    | 64 Chronic Myeloid Leukemia Signaling                           | <b>0.038</b> | 0.15  | 108 |
| 65 Role of PKR in Interferon Induction and Antiviral Response             | <b>1E-3</b>  | 0.28  | 40 | 65 FLT3 Signaling in Hematopoietic Progenitor Cells             | <b>0.038</b> | 0.18  | 91  |
| <b>66 T Cell Receptor Signaling</b>                                       | <b>1E-3</b>  | 0.23  |    | 66 Glioma Invasiveness Signaling                                | <b>0.039</b> | 0.18  | 59  |
| <b>67 Cdc42 Signaling</b>                                                 | <b>1E-3</b>  | 0.20  |    | 67 ERK/MAPK Signaling                                           | <b>0.040</b> | 0.14  | 135 |
| <b>68 Calcium-induced T Lymphocyte Apoptosis</b>                          | <b>2E-3</b>  | 0.26  |    | 68 Type I Diabetes Mellitus Signaling                           | <b>0.041</b> | 0.15  | 10  |
| <b>69 JAK/Stat Signaling</b>                                              | <b>2E-3</b>  | 0.27  |    | 69 Retinoic acid Mediated Apoptosis Signaling                   | <b>0.043</b> | 0.18  | 126 |
| 70 PTEN Signaling                                                         | <b>2E-3</b>  | 0.21  | 53 | <b>70 Purine Metabolism</b>                                     | <b>0.043</b> | 0.12  |     |
| <b>71 NF-κB Signaling</b>                                                 | <b>2E-3</b>  | 0.21  |    | <b>71 Thyroid Cancer Signaling</b>                              | <b>0.044</b> | 0.20  |     |
| 72 Renal Cell Carcinoma Signaling                                         | <b>2E-3</b>  | 0.26  | 41 | 72 Nicotinate and Nicotinamide Metabolism                       | <b>0.045</b> | 0.14  | 123 |
| 73 Hypoxia Signaling in the Cardiovascular System                         | <b>2E-3</b>  | 0.27  | 20 | 73 Axonal Guidance Signaling                                    | <b>0.048</b> | 0.12  | 101 |
| <b>74 HMGB1 Signaling</b>                                                 | <b>2E-3</b>  | 0.23  |    | 74 Inhibition of Angiogenesis by TSP1                           | <b>0.049</b> | 0.21  | 82  |
| 75 Breast Cancer Regulation by Stathmin1                                  | <b>2E-3</b>  | 0.20  | 29 |                                                                 |              |       |     |
| 76 PI3K/AKT Signaling                                                     | <b>3E-3</b>  | 0.20  | 47 |                                                                 |              |       |     |
| 77 Granzyme B Signaling                                                   | <b>3E-3</b>  | 0.44  | 32 |                                                                 |              |       |     |
| <b>78 Primary Immunodeficiency Signaling</b>                              | <b>3E-3</b>  | 0.24  |    |                                                                 |              |       |     |
| 79 TNFR1 Signaling                                                        | <b>3E-3</b>  | 0.26  | 28 |                                                                 |              |       |     |
| <b>80 Interferon Signaling</b>                                            | <b>3E-3</b>  | 0.31  |    |                                                                 |              |       |     |
| <b>81 Pathogenesis of Multiple Sclerosis</b>                              | <b>3E-3</b>  | 0.56  |    |                                                                 |              |       |     |
| 82 Inhibition of Angiogenesis by TSP1                                     | <b>3E-3</b>  | 0.31  | 74 |                                                                 |              |       |     |
| <b>83 Toll-like Receptor Signaling</b>                                    | <b>3E-3</b>  | 0.26  |    |                                                                 |              |       |     |
| <b>84 Integrin Signaling</b>                                              | <b>4E-3</b>  | 0.19  |    |                                                                 |              |       |     |
| <b>85 Caveolar-mediated Endocytosis Signaling</b>                         | <b>4E-3</b>  | 0.22  |    |                                                                 |              |       |     |

Unique pathways are in bold. Ratio, fraction of genes present in the signature list respect to all genes for each specific pathway; #, ranking order in alternate analysis.

**Table S5.** Deep sequencing of the *TSC1* mutation (TG22).

| <b>Tissue</b>                      | <b>Mutant reads</b> | <b>Wild-type reads</b> | <b>Percent Mutant</b> |            |
|------------------------------------|---------------------|------------------------|-----------------------|------------|
| Tumorgraft                         | 1,663,908           | 39,041                 | 97.707                |            |
| Patient tumor (sample 1)           | 4,687               | 1,820,112              | 0.257                 | $p=0.0034$ |
| Patient tumor (sample 2)           | 7,561               | 2,210,331              | 0.341                 |            |
| Patient normal (blood)             | 256                 | 796,149                | 0.032                 |            |
| Patient normal (connective tissue) | 313                 | 883,295                | 0.035                 |            |
| Unrelated normal sample            | 271                 | 928,206                | 0.029                 |            |

$p$  value comparing percent mutant reads in tumor vs. normal and unrelated control.
